# Supplementary material for: Identification of key modules and prognostic markers in adrenocortical carcinoma by weighted gene co-expression network analysis
Source: PubMed Central journal article supplement — Oncol Lett. 2019 Aug 6;18(4):3673–81. doi: 10.3892/ol.2019.10725 (PMC6733001; doi:10.3892/ol.2019.10725), 2019-08-06
Supplement: Supplementary_Data.pdf [file Supplementary_Data.pdf]

Table SI. Module trait PCC.

|                | Tumor stage | Age at diagnosis | Vital status | Days to death | Sex      | Race     |
|----------------|-------------|------------------|--------------|---------------|----------|----------|
| MEgreenyellow  | -0.14852    | 0.20094          | 0.040404     | 0.046406      | -0.17282 | -0.25721 |
| MEcyan         | -0.10813    | -0.14458         | -0.09646     | 0.145968      | -0.1742  | -0.46319 |
| MEpurple       | -0.27824    | -0.13139         | -0.21912     | 0.000438      | -0.06624 | -0.19385 |
| MEred          | -0.14122    | -0.17794         | -0.12652     | -0.05969      | -0.15444 | -0.65274 |
| MElightcyan    | -0.20682    | 0.132641         | -0.16112     | 0.033195      | -0.1205  | -0.04294 |
| MEyellow       | -0.34158    | 0.123086         | -0.46823     | 0.156706      | 0.013595 | -0.20805 |
| MEsalmon       | -0.14896    | -0.01967         | -0.02673     | 0.183821      | -0.18284 | 0.081948 |
| MEpink         | 0.193861    | 0.037807         | 0.186834     | -0.13931      | 0.122831 | 0.026422 |
| MEmagenta      | 0.109067    | 0.002352         | 0.15333      | -0.16176      | -0.05355 | -0.01642 |
| MEgreen        | 0.090067    | 0.101896         | 0.185215     | -0.15082      | 0.115218 | 0.057943 |
| MEturquoise    | -0.10772    | 0.080074         | -0.07363     | 0.007935      | 0.201549 | -0.09367 |
| MEmidnightblue | 0.066121    | -0.15264         | -0.02888     | 0.009002      | -0.1102  | -0.00367 |
| MEblack        | -0.04252    | -0.06057         | -0.14956     | 0.200626      | 0.323754 | 0.177197 |
| MEblue         | 0.187246    | 0.083377         | 0.071944     | -0.08796      | 0.172605 | -0.01094 |
| MEbrown        | 0.393012    | -0.10807         | 0.61581      | -0.49294      | 0.00868  | 0.258085 |
| MEtan          | 0.099684    | -0.18303         | 0.008053     | 0.214716      | -0.11657 | 0.077457 |
| MEgrey         | -0.01904    | 0.131955         | 0.148378     | 0.019711      | -0.2833  | 0.168527 |

Table SII. Module trait P-value.

|                | Tumor stage | Age at diagnosis | Vital status | Days to death | Sex      | Race     |
|----------------|-------------|------------------|--------------|---------------|----------|----------|
| MEgreenyellow  | 0.203496    | 0.083873         | 0.730716     | 0.692584      | 0.138146 | 0.025901 |
| MEcyan         | 0.355809    | 0.215859         | 0.410345     | 0.211449      | 0.134995 | 2.86E-05 |
| MEpurple       | 0.015644    | 0.261172         | 0.058924     | 0.997024      | 0.572295 | 0.095621 |
| MEred          | 0.226843    | 0.12667          | 0.279428     | 0.610933      | 0.185855 | 2.21E-10 |
| MElightcyan    | 0.075023    | 0.256612         | 0.167287     | 0.777389      | 0.303116 | 0.714498 |
| MEyellow       | 0.002707    | 0.292771         | 2.27E-05     | 0.179391      | 0.907837 | 0.073267 |
| MEsalmon       | 0.202149    | 0.866991         | 0.819951     | 0.114408      | 0.116379 | 0.484588 |
| MEpink         | 0.095606    | 0.747429         | 0.10849      | 0.233242      | 0.293779 | 0.821968 |
| MEmagenta      | 0.351613    | 0.984023         | 0.189062     | 0.165584      | 0.648188 | 0.888816 |
| MEgreen        | 0.44221     | 0.384358         | 0.111641     | 0.196509      | 0.324946 | 0.621454 |
| MEturquoise    | 0.357608    | 0.494665         | 0.53011      | 0.946133      | 0.08292  | 0.424095 |
| MEmidnightblue | 0.573011    | 0.191093         | 0.80574      | 0.938904      | 0.346602 | 0.975081 |
| MEblack        | 0.717178    | 0.605676         | 0.200298     | 0.084369      | 0.004605 | 0.128296 |
| MEblue         | 0.107698    | 0.476975         | 0.539623     | 0.453027      | 0.138651 | 0.925754 |
| MEbrown        | 0.000487    | 0.356061         | 4.10E-09     | 7.03E-06      | 0.941081 | 0.025381 |
| MEtan          | 0.394818    | 0.115998         | 0.945333     | 0.064327      | 0.319255 | 0.508918 |
| MEgrey         | 0.871191    | 0.259103         | 0.203922     | 0.866699      | 0.013782 | 0.148365 |
